# Supplementary material for: Dry and Hydrothermal Co-Carbonization of Mixed Refuse-Derived Fuel (RDF) for Solid Fuel Production
Source: MDPI journal article supplement (doi:10.3390/reactions5010003), 2024-01-16
Supplement: s1 [file s1]

Article

# Dry and hydrothermal co-carbonization of mixed refuse-derived fuel (RDF) for solid fuel production.

Andrei Longo <sup>1\*</sup>, Octávio Alves <sup>2,4</sup>, Ali Sem <sup>3</sup>, Catarina Nobre <sup>4</sup>, Paulo Brito <sup>4</sup>, Margarida Gonçalves <sup>1,4</sup>

<sup>1</sup>Mechanical Engineering and Resource Sustainability Center, Department of Science and Technology of Biomass, Faculty of Sciences and Technology, New University of Lisbon, Campus de Caparica, 2829-516 Caparica, Portugal.

<sup>2</sup>CoLAB BIOREF – Collaborative Laboratory for Biorefineries, 4466-901 S. Mamede Infesta, Portugal.

<sup>3</sup>Forest Research Centre, School of Agriculture, University of Lisbon, Tapada da Ajuda, 1349-017 Lisboa, Portugal.

<sup>4</sup>VALORIZA, Research Centre for Endogenous Resource Valorization, Polytechnic Institute of Portalegre, 7300-555 Portalegre, Portugal.

\* Correspondence: a.longo@campus.fct.unl.pt

## Supplementary Data

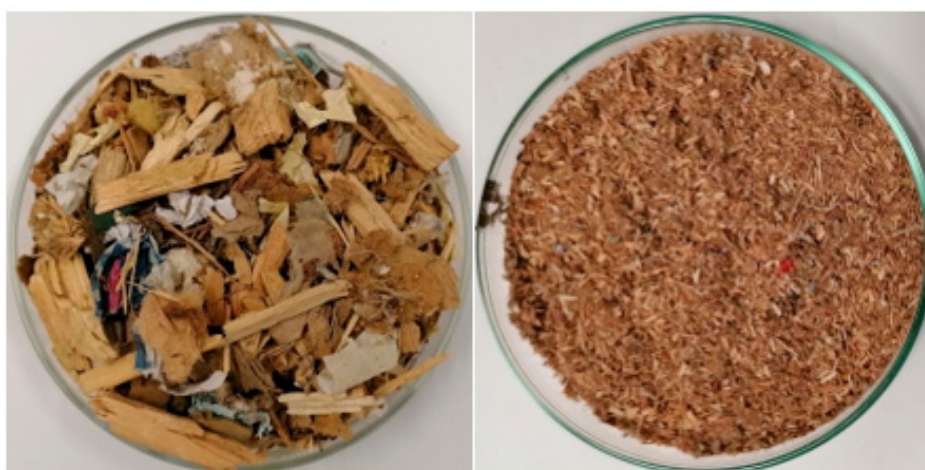

Figure S1 – Raw RDF-L before and after grinding.

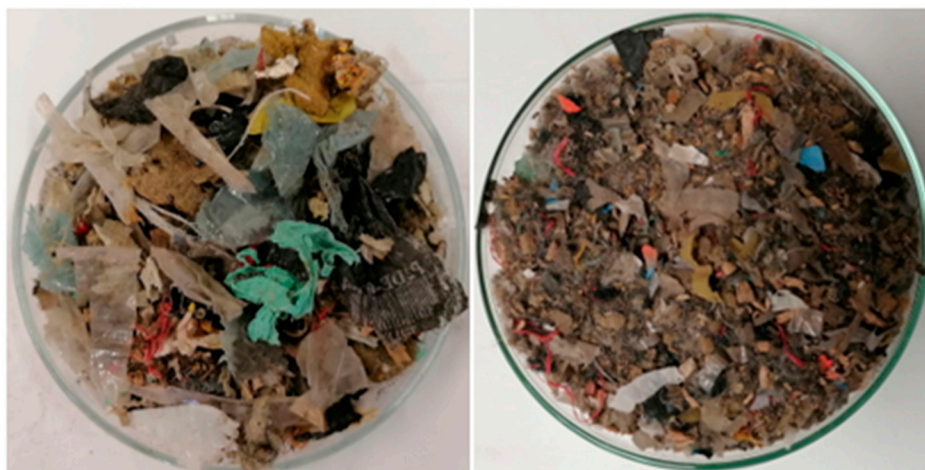

Figure S2 – Raw RDF-P before and after grinding.

**Citation:** Longo, A.; Alves, O.; Sen, A.; Nobre, C.; Brito, P.; Gonçalves, M. Dry and Hydrothermal Co-Carbonization of Mixed Refuse-Derived Fuel (RDF) for Solid Fuel Production. *Reactions* **2024**, *5*, 3. <https://doi.org/10.3390/reactions5010003>

Academic Editor(s): Carmen Branca

Received: 7 November 2023

Revised: 19 December 2023

Accepted: 6 January 2024

Published: 16 January 2024

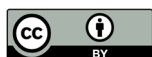

**Copyright:** © 2024 by the authors. Submitted for possible open access publication under the terms and conditions of the Creative Commons Attribution (CC BY) license (<https://creativecommons.org/licenses/by/4.0/>).

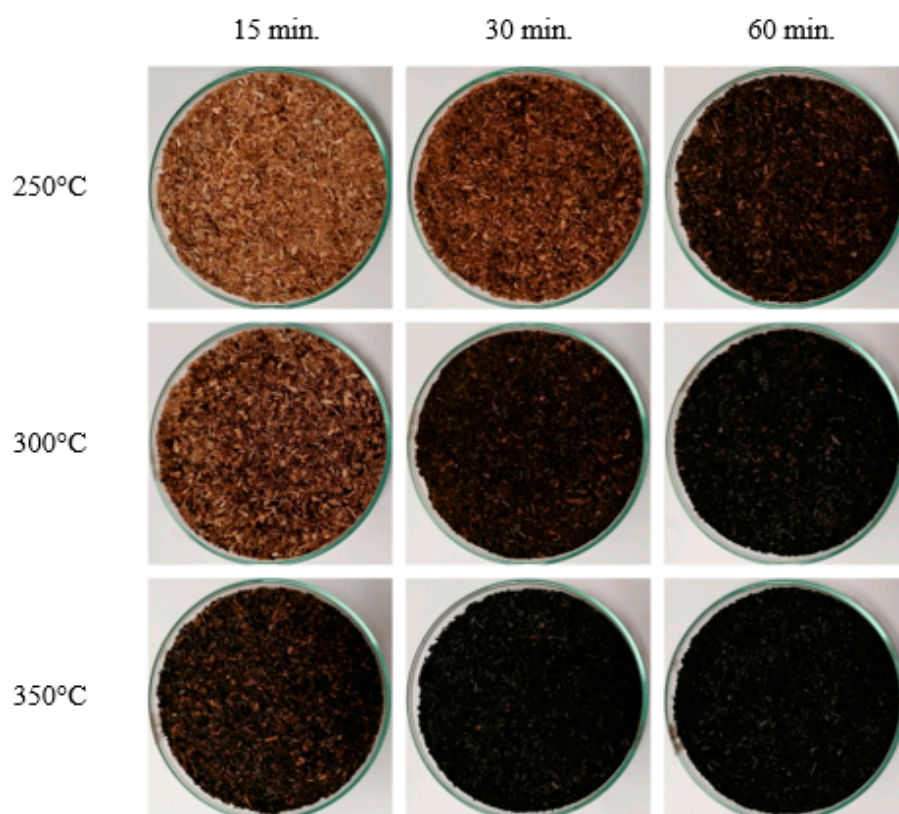

Figure S3 – Biochars produced from 100% RDF-L samples.

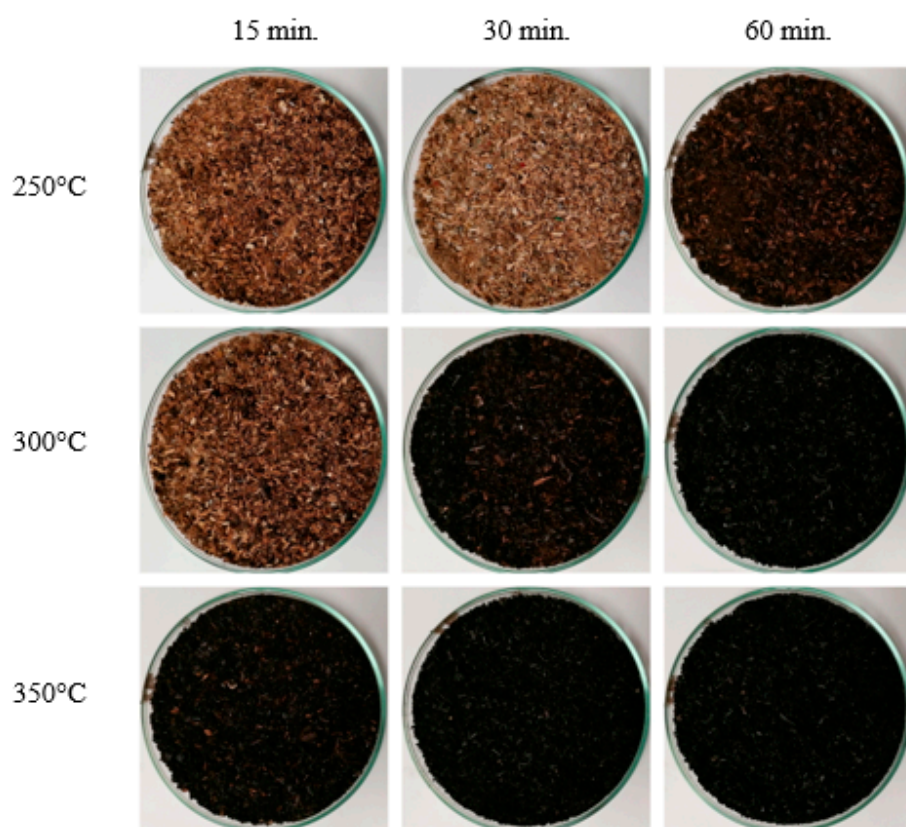

Figure S4 – Biochars produced from 75% RDF-L + 25% RDF-P samples.



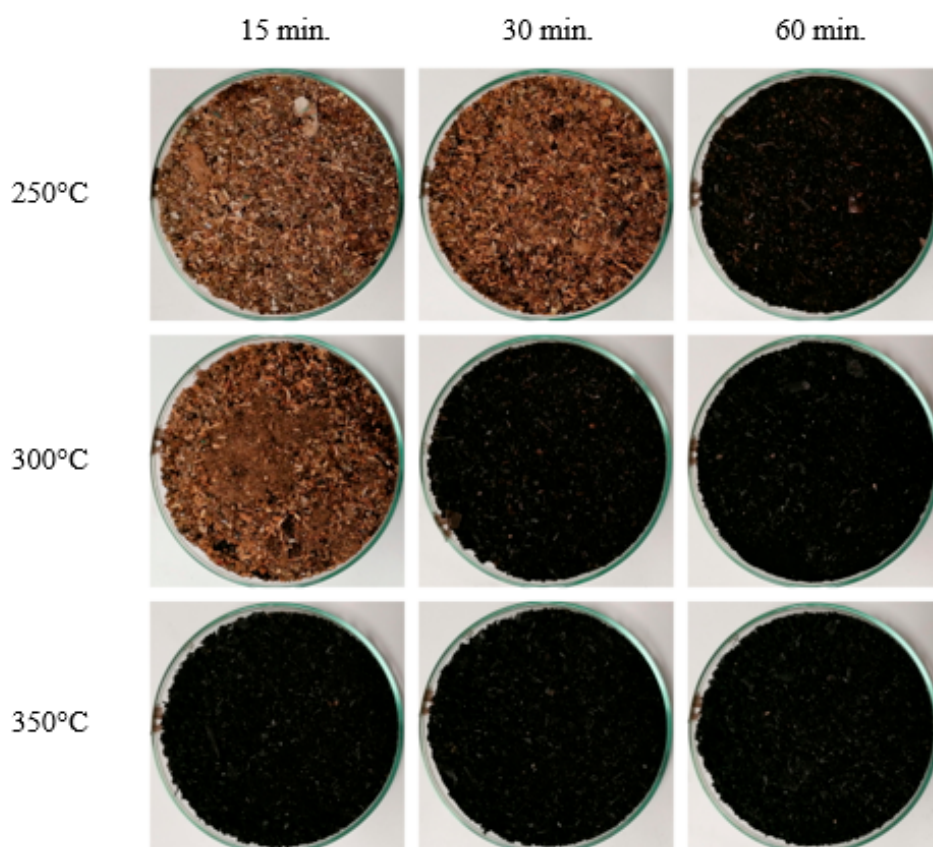

Figure S5 – Biochars produced from 50% RDF-L + 50% RDF-P samples.

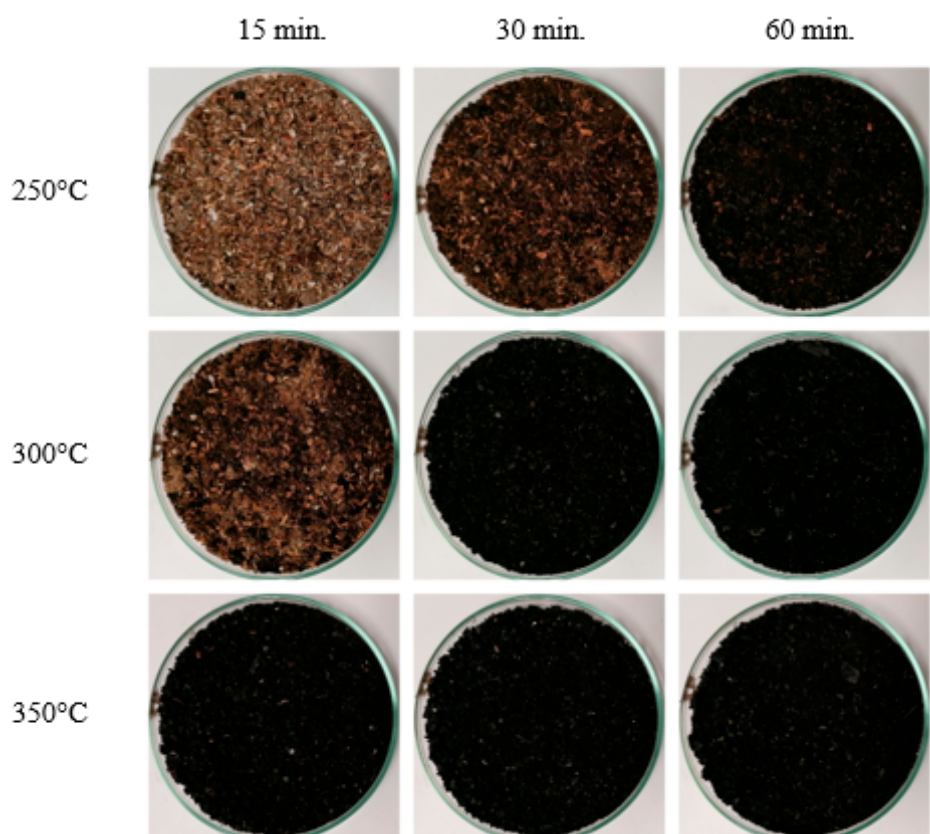

Figure S6 – Biochars produced from 25% RDF-L + 75% RDF-P samples.

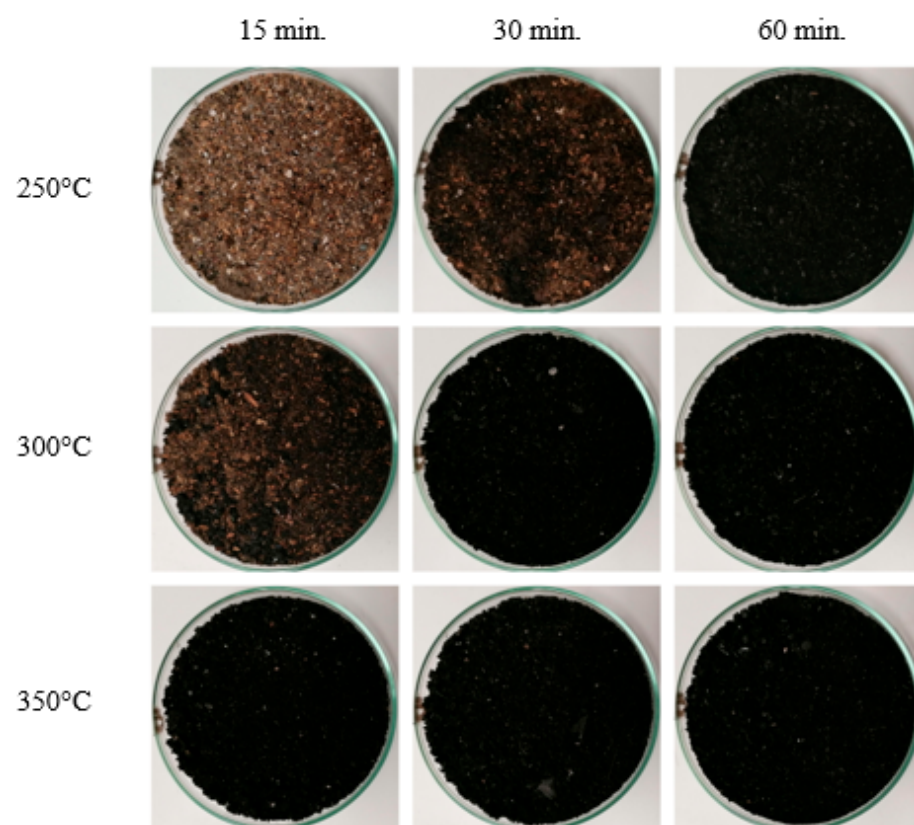

Figure S7 – Biochars produced from 100% RDF-P samples.

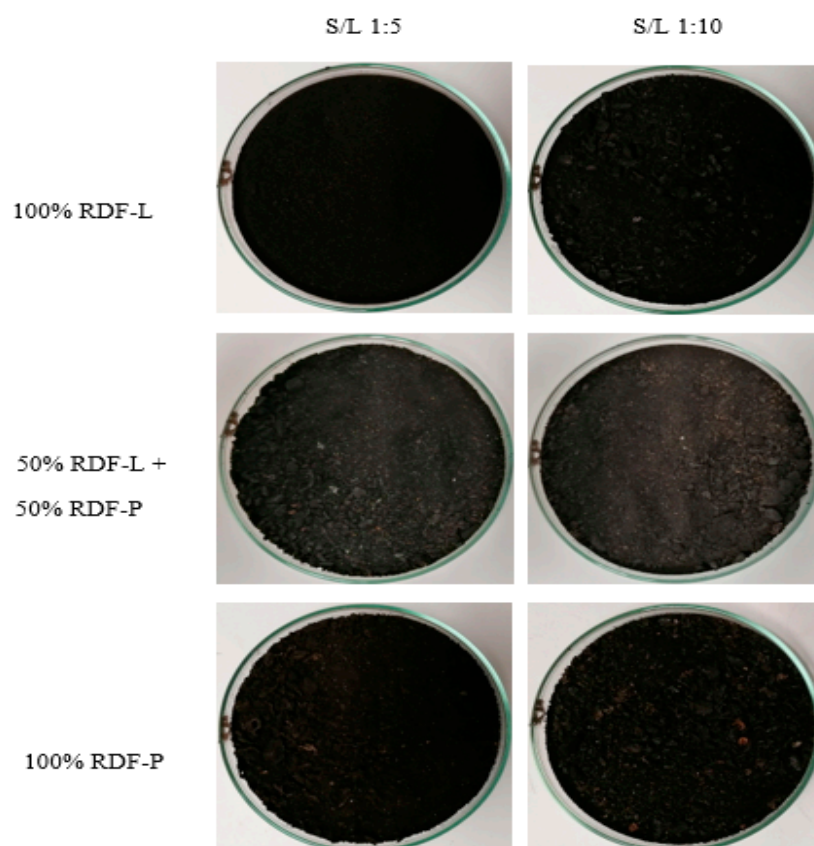

Figure S8 – Hydrochars produced at 300°C for 30 minutes.
